# Supplementary material for: Arabidopsis G-Protein β Subunit AGB1 Negatively Regulates DNA Binding of MYB62, a Suppressor in the Gibberellin Pathway
Source: MDPI journal article supplement (doi:10.3390/ijms22158270), 2021-07-31
Supplement: s1 [file s1]

## Supporting Information

Fig. S1 Verification of mutants and transgenic plants.

Fig. S2 Phenotypes of wild type (Col-0) and *agb1-2* under 10  $\mu$ M GA<sub>3</sub>.

Fig. S3 Phenotypes of wild type, *agb1-2*, and *N692967* under 1  $\mu$ M GA<sub>3</sub> treatment at 1d, 7d, and 10d.

Fig. S4 Phenotypes of wild type, *agb1-2*, and *N692967* under 10  $\mu$ M GA<sub>3</sub> treatment at 1d, 7d, and 10d.

Fig. S5 Phenotypes of wild type, *agb1-2*, and *N692967* under 100  $\mu$ M GA<sub>3</sub> treatment at 1d, 7d, and 10d.

Fig. S6 Phenotypes of wild type, *agb1-2*, *N692967*, *MYB62:GFP/WT-8*, *MYB62:GFP/WT-10*, *MYB62:GFP/agb1-2-1*, and *MYB62:GFP/agb1-2-4* under 1  $\mu$ M GA<sub>3</sub> treatment at 1d, 7d, and 10d.

Fig. S7 Phenotypes of wild type, *agb1-2*, *N692967*, *MYB62:GFP/WT-8*, *MYB62:GFP/WT-10*, *MYB62:GFP/agb1-2-1*, and *MYB62:GFP/agb1-2-4* under 10  $\mu$ M GA<sub>3</sub> treatment at 1d, 7d, and 10d.

Fig. S8 Phenotypes of wild type, *agb1-2*, *N692967*, *MYB62:GFP/WT-8*, *MYB62:GFP/WT-10*, *MYB62:GFP/agb1-2-1*, and *MYB62:GFP/agb1-2-4* under 100  $\mu$ M GA<sub>3</sub> treatment at 1d, 7d, and 10d.

Fig. S9 Phenotypic identification of wild type, *agb1-2*, *N692967*, *MYB62:GFP/WT-8*, *MYB62:GFP/WT-10*, *MYB62:GFP/agb1-2-1* and *MYB62:GFP/agb1-2-4* under 1  $\mu$ M GA<sub>3</sub> treatment at 10d.

Fig. S10 Phenotypic identification of wild type, *agb1-2*, *N692967*, *MYB62:GFP/WT-8*, *MYB62:GFP/WT-10*, *MYB62:GFP/agb1-2-1*, and *MYB62:GFP/agb1-2-4* under 100  $\mu$ M GA<sub>3</sub> treatment at 10d.

Fig. S11 Phenotypes of wild type, *agb1-2*, *N692967*, *MYB62:GFP/WT-8*, *MYB62:GFP/WT-10*, *MYB62:GFP/agb1-2-1*, and *MYB62:GFP/agb1-2-4* under normal conditions and phosphate-free conditions.

Table S1 Primers used in this study

Table S2 Composition of MS powder

Table S3 Composition of MS powder phosphate-free

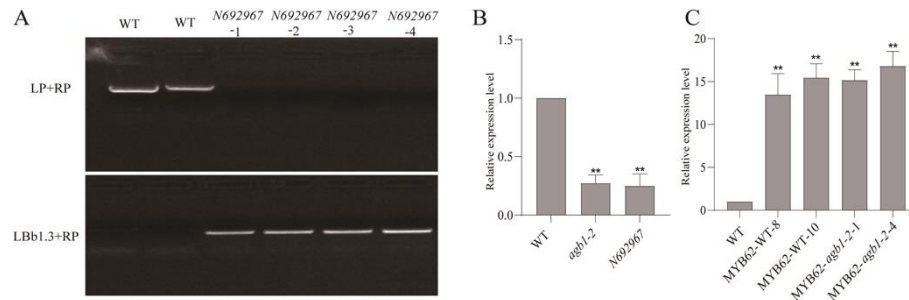

Supplementary Figure S1. Verification of mutants and transgenic plants. (A) Genomic PCR verification of *AGB1* mutant *N692967*. (B) Analysis of *AGB1* expression in *agb1-2* and *N692967* mutants, grown for four weeks, under normal growth conditions. Data is the average of three independent experiments, and the error bar represents SE ( $n = 3$ ). Significant differences were analyzed by Duncan's multiple range test ( $P < 0.05$ ). (C) Expression analysis of *MYB62* in transgenic plants *MYB62:GFP/WT* and transgenic plants *MYB62:GFP/agb1-2*, grown for four weeks, under normal growth conditions. Data is the average of three independent experiments, and the error bar represents SE ( $n = 3$ ). Asterisks indicate significant differences between genotypes. Significant differences were analyzed by Duncan's multiple range test ( $P < 0.05$ ).

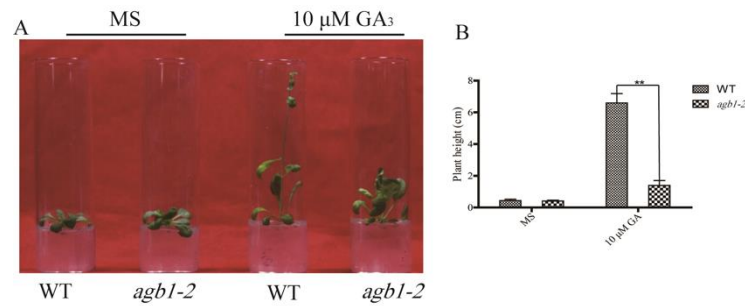

Supplementary Figure S2. Phenotype of mutant *agb1-2* and wild type (*Col-0*) under treatment with 10  $\mu$ M  $GA_3$ . (A) Plant height phenotype of wild type (*Col-0*), *agb1-2* under normal conditions and 10  $\mu$ M  $GA_3$  treatment. Scale bars, 1 cm. (B) Plant heights of wild type (*Col-0*), *agb1-2* under normal conditions and 10  $\mu$ M  $GA_3$  treatment. Data is the average of three independent experiments, and the error bar represents SE ( $n = 10$ ). Asterisks indicate significant differences between genotypes. Significant differences were analyzed by Duncan's multiple range test ( $P < 0.05$ ).

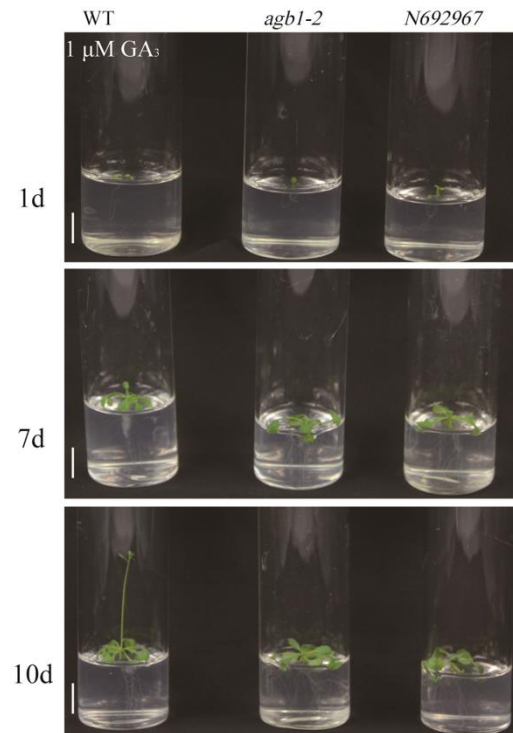

Supplementary Figure S3 Phenotype of wild type, *agb1-2*, and *N692967* under 1  $\mu\text{M}$   $\text{GA}_3$  treatment at 1d, 7d, and 10d. Scale bars, 1 cm.

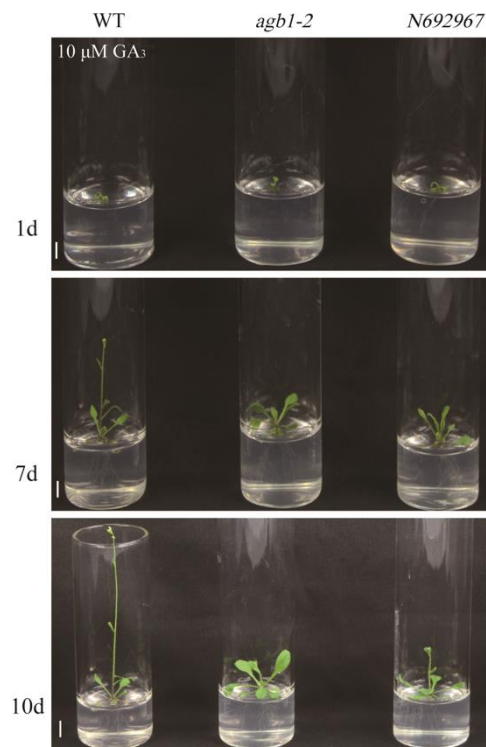

Supplementary Figure S4. Phenotypes of wild type, *agb1-2*, and *N692967* under 10  $\mu\text{M}$   $\text{GA}_3$  treatment at 1 d, 7 d, and 10 d. Scale bars, 1 cm.

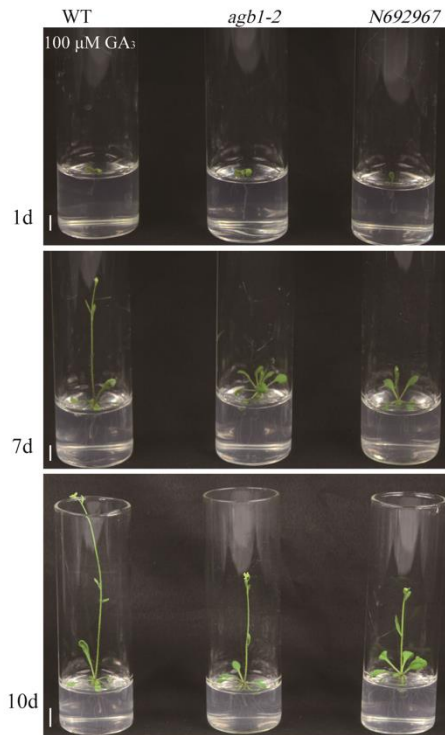

Supplementary Figure S5. Phenotypes of wild type, *agb1-2*, and *N692967* under 100  $\mu$ M GA<sub>3</sub> treatment at 1 d, 7d, and 10 d. Scale bars, 1 cm.

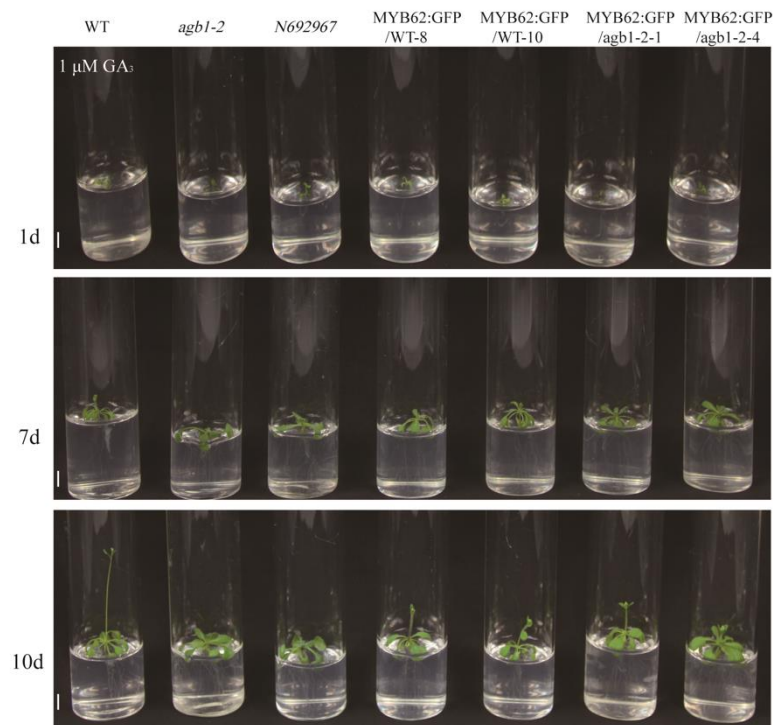

Supplementary Figure S6. Phenotypes of wild type, *agb1-2*, *N692967*, *MYB62:GFP/WT-8*, *MYB62:GFP/WT-10*, *MYB62:GFP/agb1-2-1*, and *MYB62:GFP/agb1-2-4* under 1  $\mu$ M GA<sub>3</sub> treatment at 1d, 7d, and 10d. Scale bars, 1 cm.

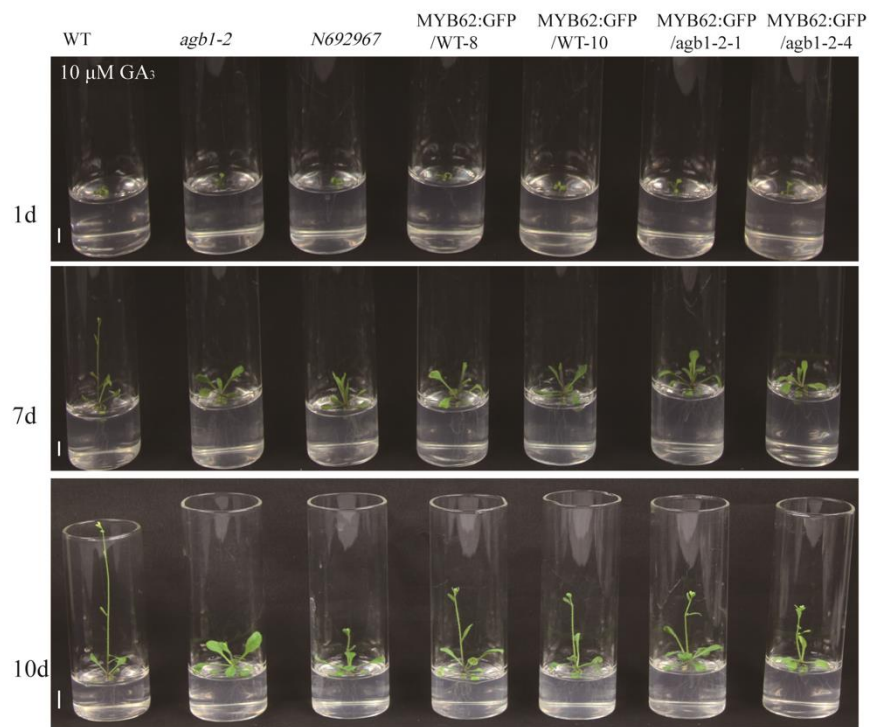

Supplementary Figure S7. Phenotypes of wild type, *agb1-2*, *N692967*, *MYB62:GFP/WT-8*, *MYB62:GFP/WT-10*, *MYB62:GFP/agb1-2-1*, and *MYB62:GFP/agb1-2-4* under 10  $\mu\text{M}$   $\text{GA}_3$  treatment at 1 d, 7 d, and 10 d. Scale bars, 1 cm.

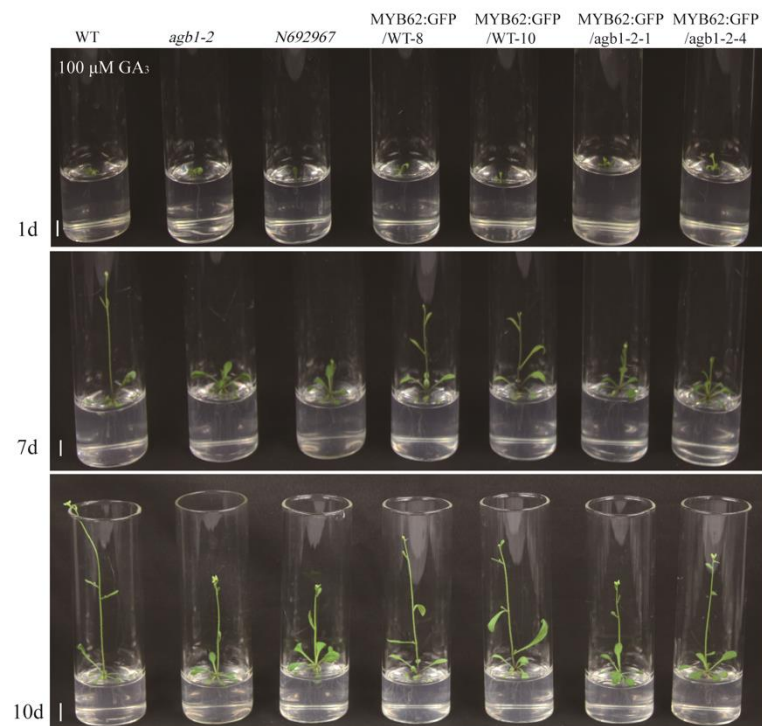

Supplementary Figure S8. Phenotypes of wild type, *agb1-2*, *N692967*, *MYB62:GFP/WT-8*, *MYB62:GFP/WT-10*, *MYB62:GFP/agb1-2-1*, and *MYB62:GFP/agb1-2-4* under 100  $\mu\text{M}$  GA<sub>3</sub> treatment at 1 d, 7 d, and 10 d. Scale bars, 1 cm.

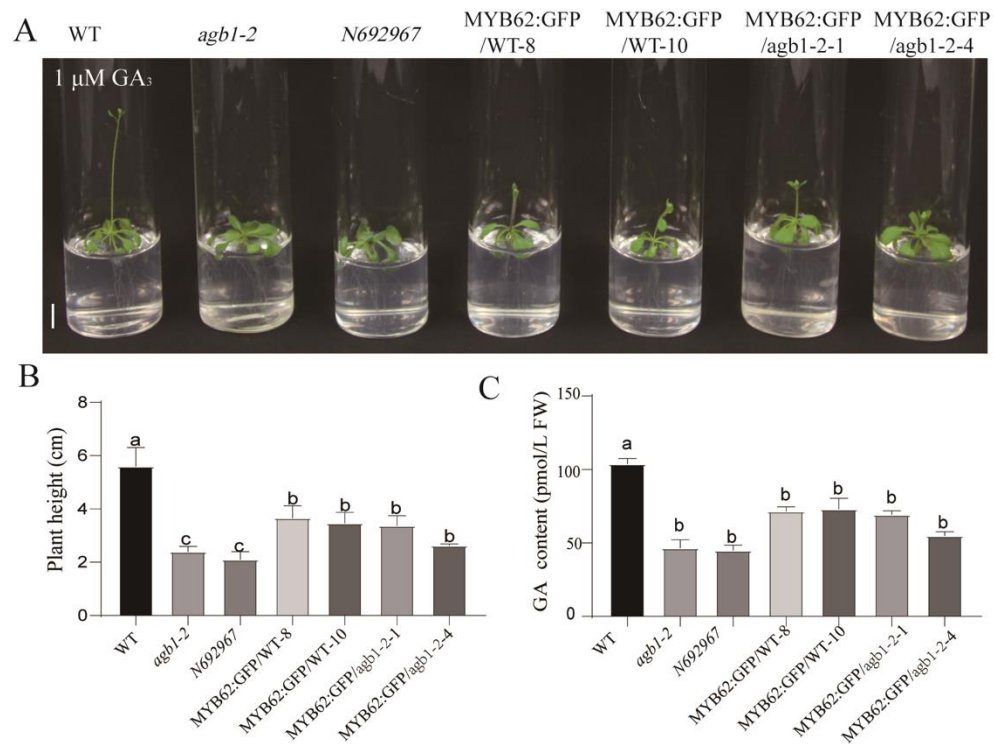

Supplementary Figure S9. Phenotypic identification of WT, *agb1-2*, *N692967*, *MYB62:GFP/WT-8*, *MYB62:GFP/WT-10*, *MYB62:GFP/agb1-2-1*, and *MYB62:GFP/agb1-2-4* under 1  $\mu\text{M}$  GA<sub>3</sub> treatment at 10 d. (A) Plant height phenotypes of wild type, *agb1-2*, *N692967*, *MYB62:GFP/WT-8*, *MYB62:GFP/WT-10*, *MYB62:GFP/agb1-2-1* and *MYB62:GFP/agb1-2-4* following 1  $\mu\text{M}$  GA<sub>3</sub> treatment at 10 d. Scale bars, 1 cm. (B-C) Plant heights and GA contents of wild type, *agb1-2*, *N692967*, *MYB62:GFP/WT-8*, *MYB62:GFP/WT-10*, *MYB62:GFP/agb1-2-1*, and *MYB62:GFP/agb1-2-4* under normal conditions. Data is the average of three independent experiments, and the error bars represent SE ( $n = 10$ ). Asterisks indicate significant differences between genotypes. Significant differences were analyzed by Duncan's multiple range test ( $P < 0.05$ ).



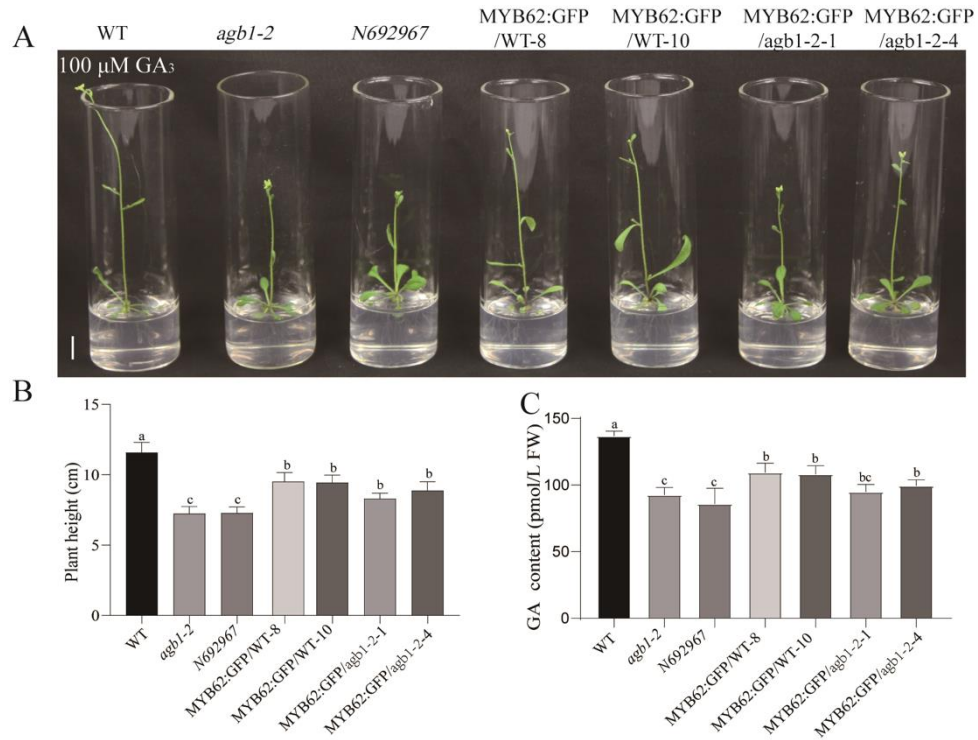

Supplementary Figure S10. Phenotypic identification of WT, *agb1-2*, *N692967*, *MYB62:GFP/WT-8*, *MYB62:GFP/WT-10*, *MYB62:GFP/agb1-2-1*, and *MYB62:GFP/agb1-2-4* under 100  $\mu$ M GA<sub>3</sub> treatment at 10 d. (A) Plant height phenotypes of wild type, *agb1-2*, *N692967*, *MYB62:GFP/WT-8*, *MYB62:GFP/WT-10*, *MYB62:GFP/agb1-2-1*, and *MYB62:GFP/agb1-2-4* following 100  $\mu$ M GA<sub>3</sub> treatment at 10d. Scale bars, 1 cm. (B-C) Plant heights and GA contents of wild type, *agb1-2*, *N692967*, *MYB62:GFP/WT-8*, *MYB62:GFP/WT-10*, *MYB62:GFP/agb1-2-1*, and *MYB62:GFP/agb1-2-4* under normal conditions. Data is the average of three independent experiments, and the error bars represent SE ( $n = 10$ ). Asterisks indicate significant differences between genotypes. Significant differences were analyzed by Duncan's multiple range test ( $P < 0.05$ ).

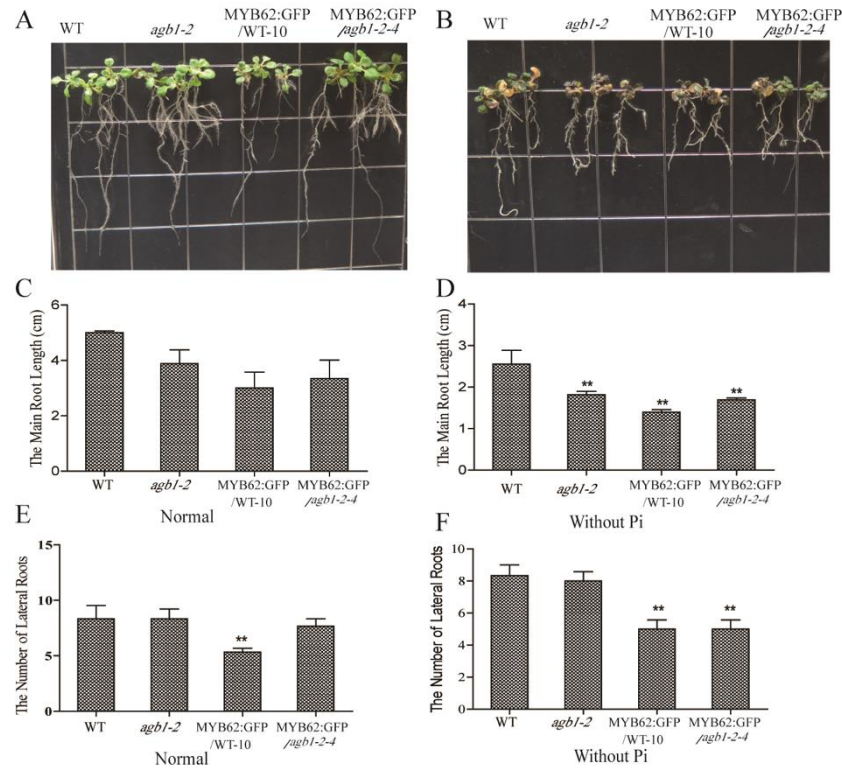

Supplementary Figure S11. Phenotypes of wild type, *agb1-2*, *MYB62:GFP/WT-10*, and *MYB62:GFP/agb1-2-4* under normal conditions and phosphate-free conditions. (A) Phenotype identification of wild type, *agb1-2* mutant, *MYB62:GFP/WT-10*, and *MYB62:GFP/agb1-2-4* under normal conditions. Bar = 1cm. (B) Phenotype identification of wild type, *agb1-2* mutant, *MYB62:GFP/WT-10*, and *MYB62:GFP/agb1-2-4* under phosphate-free conditions. Bar = 1cm. (C) The main root lengths of wild type, *agb1-2* mutant, *MYB62:GFP/WT-10*, and *MYB62:GFP/agb1-2-4* under normal conditions. Error bars represent the means  $\pm$  SE ( $n = 3$ ). Asterisks indicate significant differences between genotypes. Significant differences were analyzed by Duncan's multiple range test ( $P < 0.05$ ). (D) The numbers of lateral roots of the wild type, *agb1-2* mutant, *MYB62:GFP/WT-10*, and *MYB62:GFP/agb1-2-4* under normal conditions. Error bars represent the means  $\pm$  SE ( $n = 3$ ). Significant differences were analyzed by Duncan's multiple range test ( $P < 0.05$ ). (E) The main root lengths of wild type, *agb1-2* mutant, *MYB62:GFP/WT-10*, and *MYB62:GFP/agb1-2-4* under phosphorus-free conditions. Error bars represent the means  $\pm$  SE ( $n = 3$ ). Asterisks indicate significant differences between genotypes. Significant differences were analyzed by Duncan's multiple range test ( $P < 0.05$ ). (F) The numbers of lateral roots of wild type, *agb1-2* mutant, *MYB62:GFP/WT-10*, and *MYB62:GFP/agb1-2-4* under phosphorus-free conditions. Error bars represent the means  $\pm$  SE ( $n = 3$ ). Asterisks indicate significant differences between genotypes. Significant differences were analyzed by Duncan's multiple range test ( $P < 0.05$ ).



**Table S1 Primers used in this study**

| Name                                                                                  | Primer sequence (5'-3')                |
|---------------------------------------------------------------------------------------|----------------------------------------|
| <b>Primers used for qRT-PCR</b>                                                       |                                        |
| <i>qRT-AtAGB1-F</i>                                                                   | ACGTTTGGGATACCCTCTTGG                  |
| <i>qRT-AtAGB1-R</i>                                                                   | GTGTCCTCCAAACGCCCATA                   |
| <i>qRT-AMYB62-F</i>                                                                   | TGGCTCGATGTGTTTCCATGA                  |
| <i>qRT-AtMYB62-R</i>                                                                  | ACGCTGAATAACCATCCGCC                   |
| <i>qRT-AtGA2ox7-F</i>                                                                 | AGTGGTGAGGAGGTCAAACG                   |
| <i>qRT-AtGA2ox7-R</i>                                                                 | GAGAAGTGGCGCTAGGGTTT                   |
| <i>qRT-AtGA2ox4-F</i>                                                                 | TGTCCGACCAGTTAACCAGC                   |
| <i>qRT-AtGA2ox4-R</i>                                                                 | GGCAGGGTCGTTAGTGTGAA                   |
| <i>qRT-AtGAMT1-F</i>                                                                  | ATGGAGTCGTCACGGAGCC                    |
| <i>qRT-AtGAMT1-R</i>                                                                  | TGGAGTTGATGGCTGTCGTC                   |
| <b>Primers used to generate DNA constructs for the yeast two-hybrid assay</b>         |                                        |
| AGB1-BD-F                                                                             | AGGAGGACCTGCATATGATGTCTGTCTCCG         |
| AGB1-BD-R                                                                             | GCCTCCATGGCCATATG AATCACTCTCCTG        |
| MYB62-AD-F                                                                            | CATCGATACGGGATCCATGGAAAATTCGA          |
| MYB62-AD-R                                                                            | CGAGCTCGATGGATCCATCTCCCTAAACTG         |
| <b>Primers used to generate DNA constructs for the subcellular localization assay</b> |                                        |
| <i>AGB1-16318-F</i>                                                                   | TATCTCTAGAGGATCCATGGGCTTACTCTGC        |
| <i>AGB1-16318-R</i>                                                                   | TGCTCACCATGGATCCAATCACTCTCCTGT         |
| <i>MYB62-16318-F</i>                                                                  | TATCTCTAGAGGATCCATGGAAAATTCGAT         |
| <i>MYB62-16318-R</i>                                                                  | TGCTCACCATGGATCCCTCCCTAAACTGCC         |
| <b>Primers used to generate DNA constructs for protein expression</b>                 |                                        |
| <i>AGB1-GST-FULL-F</i>                                                                | CGGGATCCATGTCTGTCTCCGAGCTCAAAG         |
| <i>AGB1-GST-FULL-R</i>                                                                | GCGTCGACAATCACTCTCCTGTGTCCTC           |
| <i>MYB62-MBP-F</i>                                                                    | CGGGATCCATGTCTACCGATGTGGCGAGGT         |
| <i>MYB62-MBP-R</i>                                                                    | GCGTCGACAATCACTCTCCTGTGTCCTC           |
| <b>Primers used to generate DNA constructs for LUC assay</b>                          |                                        |
| <i>AGB1-nLUC-F</i>                                                                    | TCGGTACCCGGGATCCATGTCTGTCTCCGAG        |
| <i>AGB1-nLUC-R</i>                                                                    | CCATTGTTGGATCCAATCACTCTCCTGTG          |
| <i>MYB62-cLUC-F</i>                                                                   | CGGGGCGGTACCATGGAAAATTCGA              |
| <i>MYB62-cLUC-R</i>                                                                   | GTTGCTGCAGGTCGACCTCCCTAAACTG           |
| <b>Primers used to generate DNA constructs for Co-IP assays</b>                       |                                        |
| <i>AGB1-Flag-F</i>                                                                    | GGGGCCCGGGTTCGACATGTCTGTCTCCGAGCTCAAAG |
| <i>AGB1-Flag-R</i>                                                                    | TACCGGATCCACTAGTAATCACTCTCCTGTGTCCTC   |
| <i>MYB62-GFP-F</i>                                                                    | GATTACGAATTCATGGAAAATTCGATG            |

|                                                                       |                                            |
|-----------------------------------------------------------------------|--------------------------------------------|
| <i>MYB62-GFP-R</i>                                                    | GTGCTCGAATTCCTCCCTAAACTGCCAAATG            |
| <b>Primers used for genotyping</b>                                    |                                            |
| <i>AGB1-F (LP)</i>                                                    | TCATTAGATTGGACACCGGAG                      |
| <i>AGB1-R (RP)</i>                                                    | TGTGAATCCTGCTGTAATCCC                      |
| <i>MYB62-F (P1)</i>                                                   | TGAGATCAATCGGCTAAAAGC                      |
| <i>MYB62-R (P2)</i>                                                   | CAAAGATTGCGATTCATCGAT                      |
| <i>LBb1.3</i>                                                         | ATTTTGCCGATTTCGGAAC                        |
| <b>Primers used to produce transgenic plants</b>                      |                                            |
| <i>OE-MYB62-F</i>                                                     | GGGGCCCGGGGTCGACATGGAAAATTCGATGAAGAA GAAGA |
| <i>OE-MYB62-R</i>                                                     | TACCGGATCCACTAGTCC CTCCCTAAACTGCCAAATGTCAT |
| <b>Primers used to identify the homozygote <i>N692967</i> mutants</b> |                                            |
| <i>LP</i>                                                             | TCATTAGATTGGACACCGGAG                      |
| <i>RP</i>                                                             | TGTGAATCCTGCTGTAATCCC                      |
| <i>LB</i>                                                             | ATTTTGCCGATTTCGGAAC                        |
| <b>Primers used for EMSA analysis</b>                                 |                                            |
| <i>ProGA2ox7-F</i>                                                    | BIO-AAGCCCTTGTTGGGGATGG                    |
| <i>ProGA2ox7-R</i>                                                    | BIO-CCATCCCCAA CCAAGGGCTT                  |
| <b>Primers used to generate DNA constructs for LUC assays</b>         |                                            |
| <i>GA2ox7-F</i>                                                       | GCAGCCCGGGGATCCTCCATTACTAGAGAA             |
| <i>GA2ox7-R</i>                                                       | TAGAACTAGTGGATCCTAAACTGAAT TAAGT           |

**Table S2 Composition of MS medium**

| Component                                           |         |        |
|-----------------------------------------------------|---------|--------|
| Macro elements                                      | mg/L    | mM     |
| CaCl <sub>2</sub>                                   | 332.02  | 2.99   |
| KH <sub>2</sub> PO <sub>4</sub>                     | 170.00  | 1.25   |
| KNO <sub>3</sub>                                    | 1900.00 | 18.79  |
| MgSO <sub>4</sub>                                   | 180.54  | 1.50   |
| NH <sub>4</sub> NO <sub>3</sub>                     | 1650.00 | 20.61  |
| Micro elements                                      | mg/L    | μM     |
| CoCl <sub>2</sub> • 6H <sub>2</sub> O               | 0.025   | 0.11   |
| CuSO <sub>4</sub> • 5H <sub>2</sub> O               | 0.025   | 0.10   |
| FeNaEDTA                                            | 36.70   | 100.00 |
| H <sub>3</sub> BO <sub>4</sub>                      | 6.2     | 100.27 |
| KI                                                  | 0.83    | 5.00   |
| MnSO <sub>4</sub> •H <sub>2</sub> O                 | 16.90   | 100.00 |
| Na <sub>2</sub> MoO <sub>4</sub> •2H <sub>2</sub> O | 0.25    | 1.03   |

|                                      |             |           |
|--------------------------------------|-------------|-----------|
| ZnSO <sub>4</sub> •7H <sub>2</sub> O | 8.60        | 29.91     |
| <b>Vitamins</b>                      | <b>mg/L</b> | <b>μM</b> |
| Glycine (free base)                  | 2.00        | 26.64     |
| myo-Inositol                         | 100.0       | 554.94    |
| Nicotinic acid (free acid)           | 0.50        | 4.06      |
| Pyridoxine • HCl                     | 0.50        | 2.43      |
| Thiamine • HCl                       | 0.10        | 0.30      |

**Table S3 Composition of MS phosphate-free medium**

|                                                     |             |           |
|-----------------------------------------------------|-------------|-----------|
| <b>Component</b>                                    |             |           |
| <b>Macro elements</b>                               | <b>mg/L</b> | <b>mM</b> |
| CaCl <sub>2</sub>                                   | 332.02      | 2.99      |
| KNO <sub>3</sub>                                    | 1900.00     | 18.79     |
| MgSO <sub>4</sub>                                   | 180.54      | 1.50      |
| NH <sub>4</sub> NO <sub>3</sub>                     | 1650.00     | 20.61     |
| <b>Micro elements</b>                               | <b>mg/L</b> | <b>μM</b> |
| CoCl <sub>2</sub> • 6H <sub>2</sub> O               | 0.025       | 0.11      |
| CuSO <sub>4</sub> • 5H <sub>2</sub> O               | 0.025       | 0.10      |
| FeNaEDTA                                            | 36.70       | 100.00    |
| H <sub>3</sub> BO <sub>4</sub>                      | 6.2         | 100.27    |
| KI                                                  | 0.83        | 5.00      |
| MnSO <sub>4</sub> •H <sub>2</sub> O                 | 16.90       | 100.00    |
| Na <sub>2</sub> MoO <sub>4</sub> •2H <sub>2</sub> O | 0.25        | 1.03      |
| ZnSO <sub>4</sub> •7H <sub>2</sub> O                | 8.60        | 29.91     |
| <b>Vitamins</b>                                     | <b>mg/L</b> | <b>μM</b> |
| Glycine (free base)                                 | 2.00        | 26.64     |
| myo-Inositol                                        | 100.0       | 554.94    |
| Nicotinic acid (free acid)                          | 0.50        | 4.06      |
| Pyridoxine • HCl                                    | 0.50        | 2.43      |
| Thiamine • HCl                                      | 0.10        | 0.30      |
